# Supplementary material for: Molecular simulation study on the flexibility in the interpenetrated metal–organic framework LMOF-201 using reactive force field
Source: Royal Society of Chemistry journal article supplement (doi:10.1039/c9ta12065c), 2020-01-01
Supplement: c9ta12065c1.pdf [file c9ta12065c1.pdf]

Electronic supplementary information (ESI)

# Molecular simulation study on the flexibility in the interpenetrated metal–organic framework LMOF-201 using reactive force field

*Ankit Agrawal<sup>1</sup>, Mayank Agrawal<sup>2</sup>, Donguk Suh<sup>1†</sup>, Yunsheng Ma<sup>3,4</sup>, Ryotaro Matsuda<sup>3</sup>, Akira Endo<sup>5</sup>,  
Wei-Lun Hsu<sup>1</sup>, and Hirofumi Daiguji<sup>1\*</sup>*

<sup>1</sup>Department of Mechanical Engineering, Graduate School of Engineering, The University of Tokyo, 7-3-1 Hongo, Bunkyo-ku, Tokyo 113-8656, Japan

<sup>2</sup>School of Engineering, Brown University, Providence, Rhode Island 02912, United States

<sup>3</sup>Department of Applied Chemistry, Nagoya University, Furo-cho, Chikusa-ku, Nagoya, Aichi 464-8603, Japan

<sup>4</sup>School of Chemistry and Materials Engineering, Jiangsu Key Laboratory of Advanced Functional Materials, Changshu Institute of Technology, Changshu, Jiangsu 215500, PR China

<sup>5</sup>National Institute of Advanced Industrial Science and Technology (AIST), AIST Tsukuba Central 5-2, 1-1-1 Higashi, Tsukuba, Ibaraki 305-8565, Japan

**\*Corresponding Author**

\*E-mail: daiguji@thml.t.u-tokyo.ac.jp, Phone/Fax: +81 3 5841 6971.

**Table S1** L-J parameters for LMOF-201 atoms.

| Atom | $\epsilon/k_B$ | $\sigma(\text{\AA})$ | Reference             |
|------|----------------|----------------------|-----------------------|
| Zn   | 62.4           | 2.46                 | UFF <sup>1</sup>      |
| C    | 47.8562        | 3.47                 | Dreiding <sup>2</sup> |
| N    | 38.94          | 3.26                 | Dreiding <sup>2</sup> |
| O    | 48.15          | 3.03                 | Dreiding <sup>2</sup> |
| H    | 7.64           | 2.84                 | Dreiding <sup>2</sup> |

**Table S2** L-J parameters and charges for adsorbate atoms.

| Atom              | $\epsilon/k_B$ (K) | $\sigma(\text{\AA})$ | $q(e)$ | Reference |
|-------------------|--------------------|----------------------|--------|-----------|
| C_CO <sub>2</sub> | 27.0               | 2.8                  | 0.7    | 3         |
| O_CO <sub>2</sub> | 79.0               | 3.05                 | -0.35  | 3         |

## **Additional simulation details**

The reactive force field (ReaxFF) is a bond order dependent force field, which is capable of providing accurate modeling of chemical reactions with relatively low calculation cost. In their seminal paper, van Duin et al. demonstrated that ReaxFF did not require any connectivity parameters and the cost of computation was low compared to that of typical first-principles calculations.<sup>4</sup> The bond order is calculated instantaneously based on inter-atomic distances; furthermore, it includes both van der Waals and Columbic interactions. The ReaxFF parameters are trained based on rigorous comparison with density functional theory (DFT) results.

Molecular dynamics (MD) simulations were performed to obtain the structural change of LMOF-201 due to CO<sub>2</sub> adsorption in a quasi-static process at fixed temperature and pressure. It was found that the system was not at adsorption equilibrium under this condition, that is, the calculated volume change was not exactly the same as the volume change along the adsorption isotherm. However, we assumed that the unit cell dimension of LMOF-201 was sensitive to the CO<sub>2</sub> amount, while it was not as sensitive to the pressure, unless the pressure was extremely high. Under this assumption, it was expected that the equilibrium unit cell dimension calculated at fixed CO<sub>2</sub> amount, pressure and temperature was similar to that calculated at the same CO<sub>2</sub> amount and temperature, but at a different pressure.

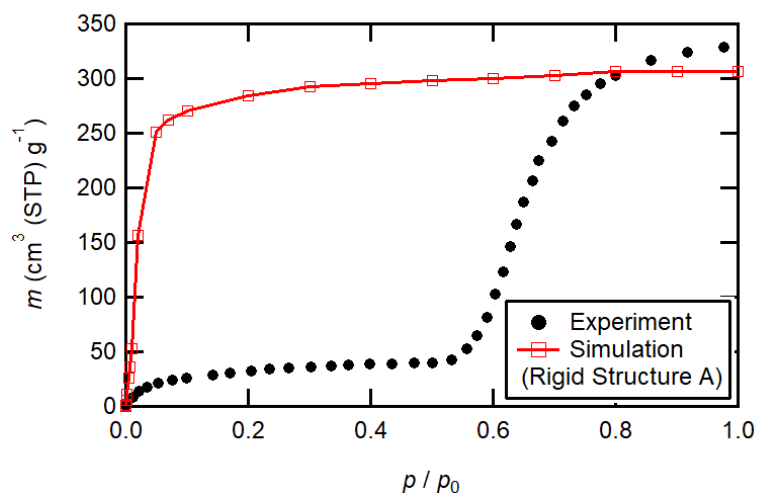

**Fig. S1** Calculated adsorption isotherm of CO<sub>2</sub> in LMOF-201 of rigid structure A at 195 K and the experimental adsorption isotherm under the same condition.

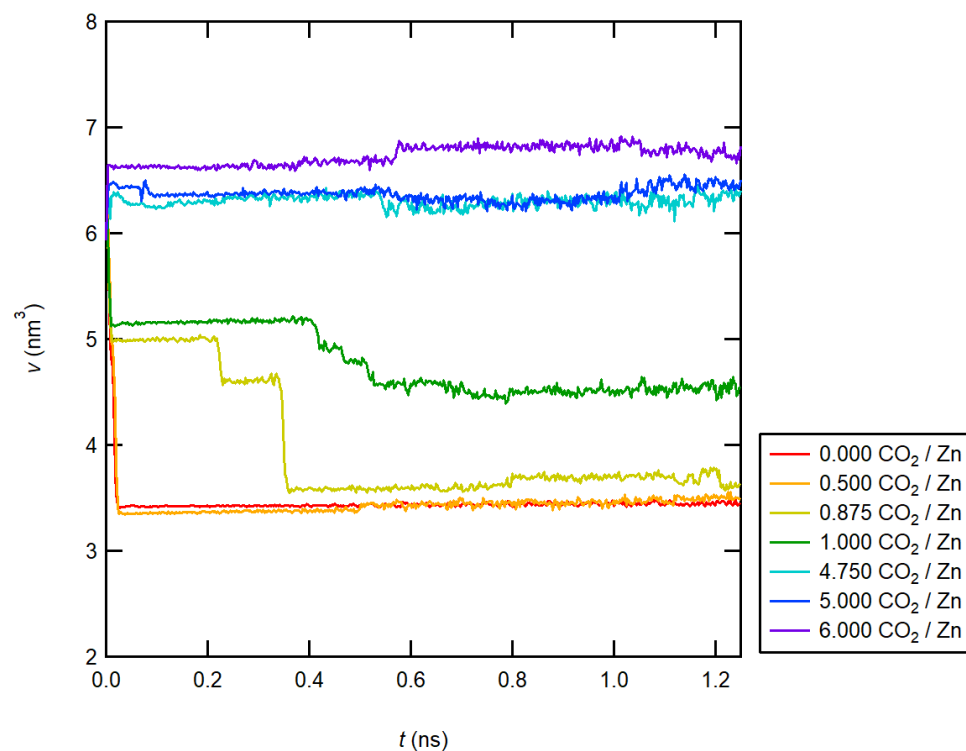

**Fig. S2** Variation of the unit cell volume of LMOF-201 for different of CO<sub>2</sub> amounts.

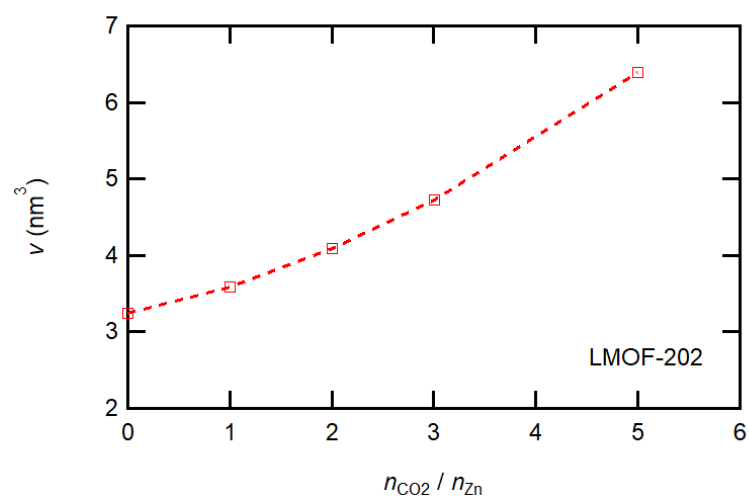

**Fig. S3** Progression of the LMOF-202 unit cell volume with CO<sub>2</sub> loading at 195 K.

## References

- (1) A. K. Rappé, C. J. Casewit, K. S. Colwell, W. A. Goddard and W. M. Skiff, *J. Am. Chem. Soc.*, 1992, **114**, 10024–10035.
- (2) S. L. Mayo, B. D. Olafson and W. A. Goddard, *J. Phys. Chem.*, 1990, **94**, 8897–8909.
- (3) Z. Li, F. Liao, F. Jiang, B. Liu, S. Ban, G. Chen, C. Sun, P. Xiao and Y. Sun, *Fluid Phase Equilib.*, 2016, **427**, 259–267.
- (4) A. C. T. Van Duin, S. Dasgupta, F. Lorant and W. A. Goddard, *J. Phys. Chem. A*, 2001, **105**, 9396–9409.
